# Supplementary material for: The caudate nucleus contributes causally to decisions that balance reward and uncertain visual information
Source: eLife. 2020 Jun 22;9:e56694. doi: 10.7554/eLife.56694 (PMC7308093; doi:10.7554/eLife.56694)
Supplement: Figure 3—source data 1. — The same data were used to plot Figure 3—figure supplement 1 and generate summary statistics in Supplementary file 1a. [file elife-56694-fig1.csv]

file	coeff_Choice_bias_estim	coeff_Choice_bias_rew_estim	coeff_Choice_bias_rewindex	coeff_Choice_slope_estim	coeff_Choice_slope_rew_estim	coeff_Choice_slope_rewindex	p_Choice_bias_estim	p_Choice_bias_rew_estim	p_Choice_bias_rewindex	p_Choice_slope_estim	p_Choice_slope_rew_estim	p_Choice_slope_rewindex	coeff_RTcontra_const	coeff_RTcontra_rewindex	coeff_RTcontra_estim	coeff_RTcontra_abscoh	coeff_RTcontra_rew_estim	coeff_RTcontra_rew_coh	coeff_RTcontra_estim_coh	coeff_RTcontra_rew_estim_coh	p_RTcontra_const	p_RTcontra_rewindex	p_RTcontra_estim	p_RTcontra_abscoh	p_RTcontra_rew_estim	p_RTcontra_rew_coh	p_RTcontra_estim_coh	p_RTcontra_rew_estim_coh	Fstat_contra	pFstat_contra	coeff_RTipsi_const	coeff_RTipsi_rewindex	coeff_RTipsi_estim	coeff_RTipsi_abscoh	coeff_RTipsi_rew_estim	coeff_RTipsi_rew_coh	coeff_RTipsi_estim_coh	coeff_RTipsi_rew_estim_coh	p_RTipsi_const	p_RTipsi_rewindex	p_RTipsi_estim	p_RTipsi_abscoh	p_RTipsi_rew_estim	p_RTipsi_rew_coh	p_RTipsi_estim_coh	p_RTipsi_rew_estim_coh	Fstat_ipsi	pFstat_ipsi
CyRT171122b	-3.179944454	-0.002348413	9.67596952	0.518298037	2.465893971	0.938480637	0.055	0.47	0.5	0.44	0.16	0.175	1118.87556	-118.6653896	14.72962695	-11.3378039	63.83535623	3.084073315	0.054544239	-1.57694145	5.29E-78	0.001828321	0.791488065	2.09E-17	0.252580065	0.012428639	0.975540813	0.3758323	23.80880289	8.36E-24	1077.760496	-52.40916132	0.15041967	-12.82216507	4.993964234	0.370252068	0.590414989	0.646059456	6.05E-68	0.237407008	0.998021324	5.02E-17	0.934382053	0.794672564	0.771690746	0.750859945	24.43125832	2.99E-25
CyRT180108b	-4.069131113	-0.422755131	4.668986627	-3.601995595	0.08760202	-0.670715369	0.01	0.395	0.405	0.17	0.5	0.47	818.9124931	-12.16949219	110.9231249	-7.248060043	12.04633613	0.956686889	-1.709293912	0.177468304	1.02E-126	0.562798871	0.000444662	1.78E-19	0.700311	0.205521762	0.122091873	0.87224868	34.07767403	9.25E-36	765.6134478	-134.7250234	1.666231263	-5.97521563	68.29526314	2.059649419	-0.666458458	-1.119074054	3.64E-104	4.22E-08	0.959495415	1.39E-13	0.037981807	0.008227955	0.550306923	0.316116914	30.05787368	2.93E-32
CyRT180115b	-0.045117351	-0.955625624	3.633301702	1.882456603	1.234813075	-2.387773331	0.465	0.22	0.21	0.24	0.345	0.355	812.4693637	1.1702495	52.28726707	-6.841981999	-60.05864329	0.840313425	0.024909823	1.254651398	8.34E-156	0.951468839	0.057555231	7.48E-22	0.029266326	0.213283922	0.979611072	0.198445104	30.94482537	1.01E-34	763.2661446	-97.38612314	14.90503302	-6.068820566	36.35105859	1.382621515	0.571319128	-0.907184233	2.47E-155	3.58E-08	0.547003471	1.95E-23	0.142332291	0.015807701	0.496660626	0.280637133	40.91790986	2.62E-43
CyRT180117b	-0.813342965	-1.332597929	6.091213795	0.782629415	5.748737591	3.454782287	0.225	0.16	0.145	0.44	0.105	0.05	899.1990091	-71.7345958	38.87208916	-8.806958036	61.67684455	2.172442379	-0.134031534	-1.629163377	2.32E-122	0.002966355	0.249892064	1.36E-21	0.068315643	0.012027695	0.910965633	0.174672829	33.4350002	3.19E-35	760.2743455	-56.21435382	42.99752916	-6.030644167	-4.63532819	0.540165606	-0.860853247	0.250189729	9.05E-111	0.012903539	0.158445328	2.79E-15	0.878982552	0.458638258	0.398523498	0.806080546	31.87703784	6.56E-34
CyRT180118d	0.576977097	-2.507801454	9.732138704	5.021124068	-5.102943984	2.469271598	0.42	0.045	0.065	0.145	0.1	0.175	866.0993408	-28.15886114	24.7781706	-8.039583594	4.765865498	1.427163908	-0.005408645	-0.177170966	4.20E-94	0.28873352	0.497599439	9.94E-18	0.896158717	0.102601903	0.996456928	0.884349544	26.42223322	3.17E-27	804.0459426	-68.3725844	36.84471814	-6.639647918	15.20767018	0.442753043	-0.300976522	0.030617396	2.84E-105	0.00223145	0.216287847	1.69E-18	0.60938152	0.528751598	0.760493562	0.975259691	37.85997361	1.22E-36
CyRT180122b	0.461219228	-0.530215294	6.577962976	-0.82549239	-12.50751215	5.209485895	0.325	0.345	0.345	0.47	0.015	0.03	907.8409569	10.71477592	2.158485961	-8.823151584	33.60787302	0.273289132	0.182497465	-0.586618269	3.07E-142	0.609498512	0.941725907	2.53E-27	0.255482378	0.714562039	0.861935959	0.576228385	42.81381385	2.08E-43	801.1217924	-70.18525423	3.984714053	-6.479727791	-5.301446392	0.665260058	0.044975965	0.720032032	7.36E-127	0.000639256	0.887668812	8.70E-20	0.85093198	0.319391455	0.961938278	0.445076528	39.55678757	3.15E-40
CyRT180125c	-1.061059562	0.222988744	4.912535725	-0.899281816	-0.591747279	-2.828968415	0.175	0.465	0.455	0.425	0.39	0.38	790.2090986	-6.916576993	-0.828869774	-6.488916303	3.741139064	0.332623126	0.35745145	0.801033641	1.94E-135	0.717817799	0.976052074	7.48E-19	0.892224999	0.629975163	0.715792289	0.414734849	24.81698417	2.34E-27	739.3260971	-124.4575141	-79.81944068	-6.09102034	-3.025856961	2.182122898	1.5186081	0.083148465	4.14E-122	7.40E-10	0.004743933	1.15E-18	0.914237195	0.000881474	0.112705663	0.930663162	38.07034135	4.54E-39
CyRT180129c	-3.241130115	0.20228193	4.937236515	-5.347424581	4.812440191	-6.375773718	0.015	0.495	0.475	0.14	0.13	0.08	852.8935681	-23.26932041	-51.1819251	-7.830638966	-22.97564981	1.263343641	0.686318892	0.515867387	1.40E-97	0.341310504	0.15908401	6.15E-17	0.526641971	0.147736406	0.585843992	0.682098916	21.51083189	1.42E-22	764.2486416	-115.0816323	-69.53100607	-6.481795582	2.744802731	1.377914902	1.22446249	0.097232948	5.43E-92	1.38E-06	0.030267947	1.29E-15	0.93151655	0.070200602	0.25532572	0.927932475	32.84829368	4.83E-32
CyRT180131b	-0.405851851	-0.711596492	4.656474191	-2.248429171	-4.476070612	2.18052079	0.33	0.25	0.255	0.32	0.19	0.17	924.8056676	-16.01318972	-225.3465858	-9.075930377	79.20000692	1.089204366	4.412890122	-1.826966578	1.40E-152	0.404144618	2.13E-15	3.21E-32	0.00365388	0.114722965	8.31E-06	0.061744058	42.71250939	7.45E-43	937.5154972	-18.4628113	-169.981775	-9.217308317	-14.87733562	-1.004593348	3.935358553	0.621712645	1.82E-119	0.454075327	8.34E-07	2.74E-26	0.660156397	0.205225547	0.000559488	0.582170041	31.55980515	5.39E-33
CyRT180201c	2.730223481	-1.492730457	5.612219066	-5.689433686	-1.917314846	2.557788005	0.01	0.105	0.115	0.08	0.365	0.35	925.6694539	-59.45732164	-79.05764673	-8.695446283	119.2406436	1.960189202	2.299792166	-2.123300042	8.05E-188	0.000832629	0.000787619	2.17E-33	5.12E-07	0.003202245	0.011219558	0.019155935	45.08634503	1.27E-47	818.8392683	-71.08462384	-104.5181	-6.897283694	29.86766544	1.064080251	1.951924045	-1.096433044	1.23E-176	1.78E-05	1.62E-05	8.16E-28	0.213155367	0.069736663	0.025140508	0.207504086	41.87434811	2.01E-44
CyRT180205d	-1.466440403	1.181642561	6.860356096	-7.200221026	0.9214166	-3.366103858	0.235	0.255	0.23	0.015	0.335	0.315	899.9331302	-2.885113806	15.07044865	-8.793920961	-36.92054674	0.509236001	0.187010434	0.899269348	9.96E-118	0.907195981	0.68421988	6.39E-17	0.319364172	0.609622529	0.897115368	0.534194701	21.18156689	1.49E-23	858.0426311	-51.83582526	-15.84797439	-7.526722643	-45.92250343	0.298332867	-0.342013896	1.478497928	1.51E-100	0.042675165	0.648746209	7.70E-18	0.18746835	0.715216517	0.773027953	0.213071032	36.79547645	2.56E-36
CyRT180207b	7.73167765	8.982996754	5.359701858	-7.398733696	-2.401097656	0.860969147	0	0	0.005	0.005	0.165	0.03	909.3619806	58.17851061	-150.3458918	-9.032168871	-27.68797223	-0.416149901	3.132306082	0.105813803	1.10E-180	0.001249865	5.84E-09	1.01E-32	0.274200672	0.549181029	0.001651785	0.914843871	45.17156232	1.90E-47	850.1930816	-28.89659495	-146.7143485	-7.148602657	10.2200885	0.056491027	2.150786161	0.363741525	4.28E-138	0.141503048	3.54E-06	1.25E-23	0.742669603	0.931761999	0.041998401	0.730120085	31.42191251	2.97E-33
CyRT180208e	-0.284621126	1.243341033	3.368003362	0.044281874	-3.563094412	2.734723913	0.425	0.155	0.155	0.475	0.14	0.165	852.0530875	7.414729345	-150.8081309	-7.124278344	17.17903473	-0.150830342	2.658980001	-0.379257949	5.83E-116	0.737440923	3.44E-06	2.07E-17	0.590061831	0.84807986	0.017935363	0.734446861	20.75112151	1.45E-22	815.459734	-75.47807414	-70.65336173	-6.929667367	-3.829062589	0.501936143	2.018182429	0.979287485	4.88E-119	0.00033418	0.017815179	1.67E-20	0.897338493	0.468915367	0.047719748	0.335479241	28.08057501	1.66E-29
CyRT180212d	0.725516837	0.125408383	6.44965581	2.541260329	-3.380889079	4.886519201	0.32	0.485	0.49	0.235	0.16	0.185	742.9819855	-10.06230361	31.80264482	-5.347924604	-44.53339536	0.45216337	-1.056859533	1.253434134	1.48E-104	0.645586683	0.298722529	1.59E-09	0.145974129	0.598818372	0.377892162	0.295782417	14.34456552	4.55E-16	769.5472424	-50.68315311	-87.75741306	-5.827412143	-32.12310648	0.43698414	1.67549415	1.644629096	4.44E-87	0.033106826	0.012036938	3.72E-12	0.355086807	0.582264718	0.157556512	0.165315543	17.04377184	5.07E-18
CyRT180214e	6.042405796	4.075316326	6.804684004	-7.628310778	-2.520096486	-0.954399453	0	0.01	0.015	0.005	0.185	0.055	943.3470618	-103.2255741	-111.7226983	-9.604299	54.51388188	2.706662548	2.270584832	-1.474271088	8.67E-132	4.17E-05	0.001257816	1.60E-25	0.113657842	0.001665333	0.059578995	0.220637819	30.00591447	4.98E-33	823.7711752	-28.06145059	-39.0097893	-6.936720969	-37.02607611	-0.386723152	0.381196622	1.808867894	2.63E-127	0.185788585	0.221124875	3.44E-21	0.245458951	0.573287683	0.716706876	0.085742286	30.49627019	1.16E-32
CyRT180215b	3.73790181	2.528234717	6.450101791	-1.342924672	-4.347530602	1.985922533	0.015	0.055	0.065	0.38	0.08	0.06	906.8460535	-25.10953516	-79.21765759	-9.170479622	-42.30057661	0.921662791	1.207919597	1.051545862	3.39E-163	0.212118181	0.004811118	4.11E-29	0.130887423	0.224715482	0.254987318	0.321616895	39.86993027	6.83E-43	837.2301187	-77.31634627	-107.3940713	-7.994899887	-38.18090573	1.00968769	2.242774042	1.157009077	3.57E-136	0.000368565	0.001390967	3.89E-23	0.253046225	0.182557653	0.051775496	0.314808468	37.62022759	3.66E-40
CyRT180219b	1.02307551	0.259415879	6.317907234	-3.462584953	-1.826871104	0.057200398	0.2	0.37	0.365	0.175	0.38	0.325	838.6307283	32.71792626	23.8027603	-7.587475527	-33.54831059	-0.045497013	-0.84777098	1.522077659	5.58E-144	0.12413621	0.42224165	1.62E-18	0.25818287	0.956019386	0.47030416	0.195197927	29.9643187	1.33E-33	829.8159709	-28.91382978	-36.716069	-7.589834811	-37.63210456	-0.11747237	0.330674175	1.219339507	6.32E-127	0.19799739	0.260839853	1.64E-20	0.249151802	0.878865219	0.770289501	0.281953005	33.08830281	1.02E-35
CyRT180221b	1.182872185	2.04955502	6.125521629	-4.116291406	-3.984949955	0.638754022	0.185	0.08	0.075	0.15	0.175	0.15	914.6756546	-55.07477325	15.22673113	-9.059414641	-6.686319084	1.982536472	-0.024592678	0.023189774	1.29E-197	0.001692173	0.539932914	1.58E-33	0.787787261	0.00438801	0.980163908	0.981295256	50.4306009	2.72E-53	886.7419453	-17.62333576	-39.96782126	-7.983276715	-63.74588397	-0.207528537	0.130909214	1.000524826	4.23E-156	0.397456776	0.18666185	4.27E-26	0.035480104	0.769059422	0.899249224	0.333471588	50.34449643	4.25E-52
CyRT180222b	3.033786633	1.625842681	5.680329017	-1.401606093	-2.172988784	2.992882126	0.005	0.13	0.13	0.365	0.305	0.24	1040.89097	20.24266899	13.46916905	-11.3825055	-49.5243176	0.233535546	0.627425164	1.233087846	2.78E-174	0.356675841	0.658401336	3.69E-35	0.1045157	0.781122368	0.594305244	0.295443656	53.49284069	6.40E-55	925.2324481	2.00276869	2.475727001	-8.285067023	-13.20656426	-0.823005072	-0.012369196	0.786015663	1.26E-172	0.914048296	0.929876544	2.38E-31	0.638807684	0.206732224	0.989948275	0.423566112	46.87560255	3.22E-48
CyRT180228c	0.279361181	1.036862219	4.149798487	-1.162800068	0.089972374	-2.905129896	0.43	0.175	0.17	0.35	0.455	0.48	932.9568167	35.17852517	46.4999741	-9.017189289	-95.01137369	-0.074884721	-0.398409609	2.098389856	1.84E-154	0.10556956	0.138795662	4.22E-23	0.00259558	0.930395263	0.743775149	0.08569477	34.59873895	6.85E-38	862.4119509	-57.12636898	10.6119063	-7.110929702	11.37100305	0.401904869	-0.567350799	-0.156384132	4.23E-146	0.005908556	0.723159757	6.05E-20	0.704261573	0.585283372	0.597553494	0.884284496	34.5184002	2.22E-37
CyRT180305b-d	18.42102475	8.430046482	4.81837717	-4.10307137	-6.791979802	1.077136422	0	0	0	0.015	0	0	957.8267378	55.67252486	-210.5367801	-9.434137688	-128.085249	-0.843509162	4.237635582	2.93316825	1.38E-117	0.037862346	5.12E-09	1.42E-21	0.000304697	0.36128384	0.000824312	0.020078472	28.62059756	6.26E-31	803.7858478	3.559425823	47.57938309	-6.721318744	-90.47447564	-0.708621207	-1.236642738	1.870930958	1.85E-95	0.882560407	0.27849093	3.16E-14	0.039915966	0.397063132	0.373590479	0.178687874	21.76928145	5.30E-23
CyRT180322c	26.24128924	-1.072611972	2.782381149	-6.015928771	0.492604193	1.153458097	0	0.38	0.475	0	0.435	0.35	870.9470793	48.54900929	-210.598465	-7.606839485	42.15750781	-0.770346048	3.383958078	-0.156367604	1.76E-70	0.148251937	1.78E-06	2.03E-10	0.327357667	0.500920289	0.02800521	0.918705196	15.41671464	1.63E-16	698.5390906	4.159881753	295.5158616	-4.629900306	50.24805427	-0.398382731	-4.931695216	-0.764549699	1.37E-59	0.879945693	5.46E-07	6.98E-07	0.376981365	0.657842172	0.00275134	0.638158092	12.82333794	3.62E-13
CyRT180326e	-0.590862172	3.156014551	3.689841587	-6.462798579	-1.255587871	1.695993408	0.35	0.005	0.01	0.02	0.415	0.405	984.4876973	38.79805261	39.1830709	-8.419856583	-0.196412695	0.402731785	-1.444777083	-0.235187858	2.32E-137	0.10522703	0.253360403	1.92E-18	0.995427432	0.657921137	0.26357367	0.855467223	34.55449541	1.22E-36	884.0343916	-64.76504167	-117.6815458	-6.854448221	-15.23891221	1.047235047	1.732006772	0.250876015	1.89E-144	0.002511604	0.000224877	8.16E-17	0.629868713	0.183379302	0.134216579	0.828018498	26.55144224	1.12E-29
CyRT180402d	-14.38170332	8.634199825	5.438343528	-2.085504188	6.855191361	-1.781773862	0	0	0.005	0.3	0.015	0	803.9796544	54.25333669	-23.51491267	-6.802001082	-30.28389128	-0.215514757	2.19115335	-0.294095165	7.81E-98	0.020438501	0.608299759	1.93E-15	0.509306898	0.788451466	0.106984181	0.82828992	17.92262714	2.77E-19	823.1040151	0.322154314	-212.1286243	-6.67578267	19.92871281	-0.744624856	3.451937601	0.116699445	5.15E-129	0.986650837	9.19E-15	5.31E-22	0.443571647	0.244341355	0.000155293	0.897018267	28.57461491	5.44E-30
FaRT161223b	-0.910281426	0.140671021	5.43728669	-2.057528065	5.145309904	0.271242414	0.33	0.475	0.495	0.305	0.075	0.025	957.542076	147.9405231	-23.67482516	-9.343926792	-86.82742299	-3.067606495	1.904074041	1.241063142	4.66E-47	0.001684828	0.714916862	1.14E-10	0.181507454	0.024813167	0.337241592	0.531315341	14.86603436	7.28E-15	650.7361895	90.67376095	91.60909764	-5.021480495	-38.35750526	-2.393834139	-0.506699191	1.415810908	2.80E-63	0.000851982	0.016300834	6.24E-07	0.311811047	0.015099495	0.713777421	0.305943322	11.96852443	7.50E-13
FaRT170113b	2.517230914	-0.297999844	7.844134577	2.146531154	1.926560416	2.900200546	0.095	0.415	0.425	0.265	0.27	0.29	758.0381192	71.92011098	88.83856462	-5.928635908	49.24056505	-1.59203208	-1.598617058	-1.462572129	1.10E-67	0.014878802	0.023852679	1.27E-10	0.208542143	0.07069371	0.201752823	0.242686107	28.62088474	1.33E-27	644.3867607	129.4978282	58.5812342	-4.870401652	49.96605601	-2.881848235	-0.039152488	-0.004453875	1.73E-51	4.52E-05	0.178569293	4.28E-06	0.250941646	0.005642727	0.978536047	0.997558029	14.43803521	4.11E-15
FaRT170117b	30.45939024	-5.832184906	9.260581583	-4.217780114	-4.081195405	6.107945752	0	0.03	0.02	0.03	0.04	0.005	809.0329822	151.7156655	-157.7403755	-6.387243039	-100.3737947	-3.64073097	2.412108687	2.291325087	1.40E-51	0.000132135	0.000680431	5.40E-09	0.029207347	0.000618629	0.07787683	0.093836819	15.83537186	1.97E-16	629.9603799	135.5925708	77.83137006	-4.555363614	7.290042486	-3.04747969	0.117720135	0.206699173	1.66E-58	2.99E-07	0.117194953	1.40E-06	0.882922873	0.00100739	0.939103713	0.893293095	10.70396226	3.77E-11
FaRT170120b	-1.333906214	1.94378904	8.152440417	2.510476778	4.061940716	3.704482872	0.235	0.195	0.19	0.22	0.07	0.05	756.8094694	75.7090322	24.74316935	-5.529882415	-28.78955081	-2.165336451	-0.413017468	0.430094167	3.23E-83	0.00432692	0.503882244	2.05E-11	0.43681497	0.006498305	0.717253283	0.70609858	20.08942373	1.58E-21	624.5072508	138.6327545	-58.70071198	-4.285341583	-46.01446691	-3.162861763	1.227790384	1.545721243	5.93E-84	3.35E-09	0.064592324	1.21E-07	0.146987819	7.93E-05	0.269155456	0.164430934	13.77283909	1.81E-15
FaRT170124b	6.871980036	0.321333506	8.819089202	-5.896217076	-2.771663439	2.49924061	0	0.49	0.46	0.015	0.175	0.12	912.9405114	71.45272387	-161.56736	-8.343896784	-15.24783402	-2.530592805	3.014575925	0.862654595	9.21E-64	0.063247608	0.001308712	5.66E-13	0.759007891	0.021213149	0.048637946	0.571076207	17.62994489	1.31E-18	606.9482758	133.7829587	49.6359007	-3.725294783	3.360272948	-2.731856718	-0.899133574	-0.003644422	7.45E-62	1.27E-06	0.215625169	0.000156697	0.933090508	0.005261056	0.523238614	0.997934668	11.27549366	2.18E-12
FaRT170125b	4.848596876	2.886123197	9.28161394	-2.54987827	1.429039048	0.184660886	0	0.1	0.075	0.17	0.23	0.275	786.6158038	74.20326274	8.42129526	-6.225631603	-22.83306142	-1.874565857	-0.427547458	0.909384519	7.26E-85	0.007357502	0.821343279	2.42E-13	0.54047713	0.021173077	0.714173521	0.436162884	23.9741744	1.95E-25	701.3322983	246.4157085	-50.70024195	-4.598608966	-104.5917525	-4.502420962	0.73145211	2.274221263	2.13E-95	2.70E-24	0.142152453	7.86E-09	0.002617001	1.54E-08	0.528327594	0.050633149	30.80921043	1.53E-31
FaRT170210b	4.58774229	0.411887403	6.210817306	-0.431156256	-0.96702225	3.51845593	0	0.45	0.46	0.44	0.365	0.295	790.3159856	87.05741009	-2.999595266	-5.991467255	86.68512805	-1.563819535	1.441662378	-2.705048038	9.14E-66	0.004001452	0.942547315	1.10E-09	0.038357525	0.095894365	0.290040714	0.047934101	19.03108156	3.57E-19	641.9107041	134.1271957	168.9054473	-4.199951186	38.48609963	-2.935315949	-2.701891803	0.6405225	2.33E-54	6.71E-06	0.000140626	5.35E-05	0.376928056	0.004310338	0.069784278	0.665992623	17.21752383	1.61E-17
FaRT170215b	9.293094438	3.043711638	7.209577882	-4.559195328	-0.685793306	3.374648047	0	0.02	0.02	0.025	0.425	0.115	755.2556978	66.79258041	-21.650738	-5.832743197	-42.94514888	-1.727393872	0.524069298	0.862140204	2.00E-97	0.003756126	0.463610349	3.39E-17	0.146592352	0.007997957	0.559370637	0.337129423	30.33621607	6.79E-31	580.0869014	82.24301386	58.03883326	-3.586085659	3.940666755	-1.732683458	-0.49660878	0.349547923	4.27E-101	3.79E-06	0.045997878	4.00E-08	0.891864006	0.006805002	0.608224179	0.718210214	13.43816465	4.92E-15
FaRT170217b	-5.189449028	6.797907883	4.41524152	6.824037379	3.644094167	2.963324173	0.005	0	0	0.005	0.12	0.115	778.8784281	117.0363195	67.42165222	-5.685971676	-68.93263454	-2.415268365	-0.233394504	0.871508962	4.78E-87	3.95E-06	0.087101048	1.38E-12	0.080292125	0.00167834	0.84471182	0.464771716	23.58656476	2.80E-24	680.987949	139.3621167	-24.25103276	-4.818258124	-5.090730579	-2.627318157	0.317275929	0.068398512	1.86E-73	1.92E-07	0.498310594	1.27E-07	0.886915094	0.003301811	0.795603694	0.955463084	16.08428619	2.05E-17
FaRT170221b	1.891411684	1.373253759	8.977785161	-4.319161276	-3.148266983	3.15561909	0.175	0.25	0.275	0.095	0.19	0.15	881.3314862	75.29834905	29.06477218	-6.765059477	129.041351	-1.953104113	0.727835757	-3.848275674	2.42E-61	0.033663959	0.566576157	3.10E-10	0.011614258	0.056203853	0.630191218	0.01158772	22.74004031	4.48E-22	787.2346865	239.8391898	-105.0065784	-7.248016579	-76.89734425	-4.570744272	2.792333518	1.761067806	8.98E-75	3.09E-15	0.010263077	4.74E-12	0.05928182	6.83E-06	0.048515227	0.212225932	23.72832295	4.95E-24
FaRT170223b	4.526508334	-0.200813165	10.4317594	-5.717808785	-2.70979198	5.1281471	0.03	0.415	0.42	0.005	0.185	0.165	925.8112438	97.37638749	-130.7468895	-8.556190313	37.24929749	-3.110993074	2.968563139	-0.151398742	8.94E-68	0.011751286	0.010307613	1.71E-14	0.462210023	0.003354498	0.045769521	0.91853925	25.803383	1.45E-26	716.8247797	177.2003535	-1.336477048	-5.670145292	-21.59202954	-3.493230571	1.424820646	1.445461639	6.48E-83	5.99E-11	0.97229457	3.65E-09	0.574829143	0.000214013	0.291227663	0.284307876	20.23497684	4.37E-22
FaRT170227b	-2.179936459	2.634458202	6.231606184	3.916512041	0.336839212	4.77404009	0.105	0.055	0.035	0.115	0.385	0.345	850.0456408	84.28437564	1.583691325	-7.356264674	72.81319306	-1.890458453	0.442841524	-1.698115103	4.28E-96	0.001174152	0.967081827	9.62E-19	0.058625153	0.014834933	0.704031689	0.145949788	38.50208984	4.88E-37	695.4656576	116.8616643	-80.59112995	-5.382454824	-38.3607716	-2.195171316	1.533713178	0.663832723	1.65E-93	9.85E-07	0.013853878	4.16E-10	0.239680424	0.008930475	0.19108075	0.571056409	14.65190371	1.56E-16
FaRT170302b	-3.891088801	-0.992028127	9.667393898	4.06166364	0.017031929	2.441916314	0.035	0.36	0.345	0.175	0.46	0.42	893.5551573	80.04282196	18.07994478	-7.953924548	90.56182446	-2.807061582	0.671221395	-1.867110625	1.62E-55	0.038355185	0.765303783	9.23E-11	0.136033059	0.015912596	0.708881344	0.29965865	21.08029453	1.92E-20	658.890727	72.0800492	31.40289687	-3.549809167	73.74449832	-0.761553977	-1.720295321	-2.594588665	3.04E-57	0.014729432	0.437389094	0.000651788	0.069106926	0.45846397	0.231947481	0.072037545	10.20927989	5.91E-11
FaRT170308b	0.792005202	1.024761607	6.858843267	5.909458907	3.716076321	0.731437705	0.255	0.255	0.22	0.06	0.145	0.225	810.7341043	96.32809205	-49.6213151	-6.632448347	-9.654300327	-2.19142308	2.459068701	-0.569953815	2.89E-83	0.00044425	0.194299437	3.02E-14	0.800301169	0.008067104	0.04104118	0.634434114	19.99830438	4.55E-21	673.8366508	137.6499137	51.69555397	-4.389422494	71.4852745	-2.85038373	-1.096245	-1.085877313	2.76E-85	5.59E-09	0.113796823	6.88E-08	0.029110372	0.000372238	0.330686957	0.335272619	26.02696907	6.26E-27
FaRT170315b	-1.124821894	0.929418092	6.271076981	1.202324898	1.179420805	2.751035272	0.255	0.36	0.37	0.315	0.325	0.305	769.2093708	54.18748089	25.40255761	-5.769011741	-44.08173052	-1.350283625	0.386422899	0.205237411	1.03E-78	0.041523454	0.512831212	2.59E-11	0.256548147	0.101966518	0.753115431	0.867315939	14.84913497	6.32E-16	671.5920747	139.0119928	-26.535104	-4.955619004	-9.566246391	-2.50765729	1.31216365	0.534552441	7.11E-73	2.09E-07	0.475599818	1.78E-07	0.796946204	0.007036857	0.318704762	0.684343895	14.52146321	7.05E-16
FaRT170320b	4.386606007	3.435091878	6.511743312	-3.684707778	-3.027871829	6.611622581	0.03	0.095	0.1	0.085	0.15	0.07	797.5666776	92.67271893	-60.77059958	-6.884890474	-58.81357641	-2.180541917	1.89287276	1.188786028	6.36E-57	0.006525692	0.185502889	1.04E-10	0.19999603	0.030874912	0.187124304	0.406715054	13.76101354	3.47E-14	610.3929164	129.642726	65.54560713	-4.070663769	-12.1285849	-2.720446751	-0.705530939	0.642823134	3.51E-57	2.08E-06	0.105790289	3.14E-05	0.763967397	0.00484672	0.612209028	0.644157629	11.04124534	1.05E-11
FaRT170331b	7.30198193	-1.043271424	10.88222843	-1.429703523	-3.222428961	4.626882401	0.005	0.345	0.29	0.28	0.11	0.08	815.3428119	116.1318938	-82.8291615	-6.10878559	-51.5325981	-3.172957118	1.118109321	1.061866248	3.04E-64	0.000590206	0.06423159	4.13E-10	0.248441302	0.000795678	0.39789793	0.422019669	20.34081619	6.97E-21	665.665969	102.5538588	46.54164738	-4.257603945	-19.23670662	-1.79309318	-1.121722022	0.299430142	1.78E-86	2.92E-06	0.163313438	7.61E-08	0.563845701	0.020305553	0.321446647	0.791073896	14.41206341	1.21E-15
FaRT170403b	4.309376803	2.146673629	9.22028179	-2.758103633	-3.826263099	6.581775829	0.005	0.095	0.12	0.225	0.135	0.12	875.0772421	144.5726615	-80.22356791	-7.869179693	-65.18295813	-3.530698282	1.541423038	1.732682106	4.66E-90	4.38E-07	0.045505912	2.05E-19	0.103709742	1.67E-05	0.200367917	0.150211013	38.23434153	1.50E-36	713.7798015	175.1598835	25.49154766	-5.610001795	-2.987623364	-3.31293181	-0.504835136	-0.175411477	1.37E-75	1.39E-09	0.54416602	4.76E-08	0.943311996	0.001039619	0.729514672	0.904361349	18.32304988	4.23E-20
FaRT170405b	-3.649066605	2.852782791	6.466257275	0.246794415	-2.660479592	5.21233426	0.02	0.035	0.025	0.45	0.17	0.215	849.6958067	138.2091326	-93.80547119	-7.581991867	-31.8306203	-3.43323376	1.880374541	0.333133972	2.20E-88	1.11E-06	0.027313304	6.17E-17	0.452043293	6.49E-05	0.149434577	0.798041357	30.91608957	5.49E-31	699.8054788	145.3543843	-81.34878238	-5.62791502	-83.44493882	-3.212404747	1.934675591	2.227015562	6.06E-82	2.29E-08	0.022814477	8.60E-10	0.01956315	0.000341996	0.122131666	0.075364386	14.36769473	6.18E-16
FaRT170414b	-1.369771189	-0.753206155	8.762492407	-1.856205709	-1.818419282	3.049748556	0.3	0.335	0.335	0.205	0.185	0.145	853.802847	126.5225105	-192.3052002	-7.85770228	-37.93708707	-2.647236772	3.335056385	1.099134925	7.57E-91	1.20E-06	3.85E-07	2.48E-21	0.303461361	0.000487003	0.003298967	0.328779586	33.53534663	6.07E-32	670.35441	138.1359573	-123.2881524	-5.231514753	-87.3178672	-3.275197561	2.732203768	2.61169932	1.63E-92	1.19E-09	7.97E-05	8.83E-11	0.004910191	3.32E-05	0.012437636	0.016832647	14.40274426	4.53E-16
FaRT170421b	-2.183467973	3.736864082	6.691826885	0.558722618	-3.255848777	4.34244215	0.185	0.045	0.04	0.425	0.115	0.17	779.8868932	59.64794096	129.2714686	-5.837978361	15.71108073	-1.483071857	-0.022821588	-1.009714411	4.17E-60	0.054305522	0.009139876	5.29E-09	0.749034284	0.120202853	0.987749458	0.497211787	17.49809595	1.97E-17	707.6207898	151.036149	-66.89663353	-5.011681025	-55.54822341	-3.314970817	3.331298134	3.154321053	1.41E-56	2.32E-06	0.139457272	7.34E-06	0.21937155	0.002618994	0.035138949	0.045931922	9.292138931	6.78E-10
FaRT170517b	12.55802752	0.986338798	7.289138338	-10.35402296	-7.214224176	7.722872352	0	0.39	0.445	0	0.025	0	887.3087201	92.85281403	-79.8643687	-8.190554405	27.42354229	-2.680104431	2.345525292	-0.631471235	4.60E-62	0.015622826	0.097842528	1.68E-13	0.568714676	0.0108941	0.103760132	0.660526299	23.07035535	1.61E-23	678.6518521	184.0260877	-4.148719892	-5.001421603	-25.18679877	-3.737526593	0.276380233	0.721587845	3.99E-79	2.32E-13	0.912702648	2.14E-08	0.505883314	2.19E-05	0.835058593	0.586797477	21.36226441	2.93E-22
FaRT170519b	4.031683058	-2.165933583	9.267676276	7.405185117	3.929997919	4.061443341	0.01	0.115	0.1	0.03	0.22	0.285	936.3129231	-1.790178131	-185.2489153	-8.394579822	102.1092295	-1.139530411	3.264888105	-1.450913147	5.53E-73	0.958784193	0.000134847	6.01E-15	0.033354774	0.257197394	0.026161633	0.320908208	19.4900999	2.43E-20	707.0529179	164.6968167	-13.22058147	-5.334904433	-64.59830377	-3.032738466	0.448135676	1.379759889	6.94E-70	8.70E-09	0.740900052	7.90E-08	0.107097532	0.001831353	0.743658611	0.314483193	15.10418465	2.98E-16
FaRT170522b	3.324339496	0.768924222	5.475846607	-5.204953822	-5.474590949	7.036552816	0.025	0.32	0.365	0.045	0.02	0.01	785.7490297	129.7401606	-7.846646778	-5.453800129	-32.79709038	-3.243111181	-0.443009971	1.158035036	7.77E-81	1.47E-06	0.829058415	2.65E-11	0.367223743	4.33E-05	0.696196152	0.307884797	26.00867565	5.45E-26	705.7303898	157.4101583	-49.3723506	-5.817384087	-107.4427721	-3.326460272	1.172888713	2.345543685	1.33E-74	9.01E-09	0.206764782	3.28E-09	0.006313486	0.000530465	0.390235907	0.086462981	14.37413558	1.20E-15
FaRT170523b	-3.029113197	-1.414984881	7.517615598	-5.082164233	-5.15769197	9.152475463	0.035	0.175	0.17	0.08	0.055	0.02	875.4467349	23.90910695	43.22900033	-6.694999675	62.32629251	-1.159769734	-0.880791315	-1.20129058	2.46E-80	0.446520257	0.343376028	5.61E-12	0.172304944	0.21202387	0.525363793	0.386540199	20.36755256	9.25E-22	746.757441	157.8706722	-10.4902614	-6.067245003	4.02276668	-3.596155577	0.016219127	0.164512402	1.20E-82	2.89E-08	0.784163094	2.06E-09	0.916344968	0.000294114	0.990566687	0.904544609	20.38151076	2.03E-22
FaRT170530b	1.562485217	0.834455634	9.806171979	0.43132747	1.996054907	0.347390876	0.26	0.38	0.37	0.405	0.34	0.33	916.9957086	158.1262489	-113.712093	-7.712567469	-101.9571196	-3.382827234	2.027281597	1.648785797	3.66E-46	0.000395995	0.056595295	8.08E-09	0.087004933	0.008099716	0.262335556	0.361622733	13.74057668	1.31E-13	753.1666748	216.7464055	-58.1594394	-6.055011156	-44.78785705	-4.392498242	1.465286027	0.99059035	1.47E-52	8.03E-10	0.221985612	1.83E-07	0.346526903	0.000114835	0.355007137	0.531496326	14.08197388	2.91E-14
FaRT170531b	4.870757301	-1.409317974	7.546801405	-2.320656744	-1.794289763	4.218679358	0	0.23	0.22	0.18	0.24	0.24	839.0404195	100.9456632	-84.19893236	-6.688651309	-16.93275587	-3.246602585	1.965118321	1.059241464	9.49E-74	0.001400862	0.049543372	7.10E-12	0.691735196	0.000547461	0.144789397	0.431134058	17.55923199	1.10E-18	662.9473266	82.04340172	53.5768015	-4.543419109	38.26254053	-1.424630837	-1.130057816	-1.462269529	8.82E-68	0.00240091	0.171395617	2.20E-06	0.328208252	0.129396242	0.40067477	0.277065876	11.65575399	1.00E-12
FaRT170602b	3.28955733	1.347944482	5.45624009	-0.96984984	-0.82485261	2.339350487	0.05	0.29	0.305	0.33	0.365	0.355	836.2029426	54.69359858	39.84292792	-6.521782802	18.16519336	-1.627664325	-1.024568417	0.082762069	1.73E-74	0.063547896	0.331006638	3.93E-12	0.657341374	0.067537141	0.431298608	0.949276134	20.16651049	1.22E-20	686.7418327	161.1700569	-30.1824227	-5.073540561	-35.01530637	-3.636847851	0.709314003	1.07479277	5.62E-72	2.20E-09	0.426245391	8.69E-08	0.356105224	9.85E-05	0.59131145	0.416065522	14.72535249	7.94E-16
FaRT170605b	2.311682064	1.972610616	6.598447565	-1.759707374	-0.389308804	5.940259983	0.095	0.11	0.115	0.3	0.475	0.33	879.3438105	69.53323807	-22.59638581	-7.187714712	110.3275568	-1.851696215	-0.329623083	-2.251349059	3.14E-86	0.025319496	0.602507758	1.73E-13	0.011422269	0.047368514	0.80824216	0.098161929	30.67606974	1.01E-31	757.6155237	194.0233606	-83.72766611	-6.488505227	-74.82127305	-4.38651077	1.855801498	2.049386573	2.66E-97	3.66E-14	0.021086571	2.28E-12	0.039126571	1.27E-06	0.146948775	0.109355299	23.5401029	1.27E-25
FaRT170606b	0.123536365	-0.823171703	6.70862653	-3.114736922	-3.581476683	6.483625659	0.415	0.37	0.345	0.13	0.085	0.07	1010.357726	90.77096317	-92.65914583	-9.207294216	-13.70832245	-2.317294332	1.847699316	0.930920656	4.10E-71	0.017481465	0.080883654	2.61E-14	0.795543984	0.041367896	0.259107272	0.569233761	20.95380547	1.48E-21	805.3754628	201.3725655	-120.3138052	-7.802153627	-93.47927439	-4.38703204	3.287836631	2.212436472	5.09E-73	5.90E-10	0.006706274	2.23E-11	0.034652628	0.000106632	0.037294924	0.160136837	16.88566477	2.67E-18
FaRT170607b	-0.278049908	5.076602011	5.829666906	-3.235595123	-2.718518675	3.594784189	0.405	0	0.01	0.055	0.095	0.075	906.7852381	34.45780681	-14.78790852	-7.557121783	-10.7398125	-1.587160218	0.27914561	0.408940722	5.42E-74	0.319871776	0.777340165	2.60E-12	0.837272491	0.123416999	0.858013446	0.793260336	15.78738159	3.77E-17	705.9341677	184.0709378	-83.57442539	-4.520625399	-72.53636181	-3.981630833	1.315581017	2.05311424	9.12E-97	1.23E-14	0.012379905	7.07E-08	0.02974117	1.83E-06	0.262797153	0.080981305	20.34267743	2.15E-22
