# Supplementary material for: The caudate nucleus contributes causally to decisions that balance reward and uncertain visual information
Source: eLife. 2020 Jun 22;9:e56694. doi: 10.7554/eLife.56694 (PMC7308093; doi:10.7554/eLife.56694)
Supplement: Figure 5—source data 1. — The same data were used for plots in Figure 5—figure supplement 2, Figure 5—figure supplement 4, Figure 6A and E, Figure 6—figure supplement 3, and for the summary statistics in Supplementary file 1b. [file elife-56694-fig5-data1.csv]

file	B_alpha_rew0estim0	B_alpha_rew0estim1	B_alpha_rew1estim0	B_alpha_rew1estim1	B_d_rew0estim0	B_d_rew0estim1	B_d_rew1estim0	B_d_rew1estim1	a_rew0estim0	a_rew0estim1	a_rew1estim0	a_rew1estim1	k_rew0estim0	k_rew0estim1	k_rew1estim0	k_rew1estim1	me_rew0estim0	me_rew0estim1	me_rew1estim0	me_rew1estim1	t0_rew0estim0	t0_rew0estim1	t0_rew1estim0	t0_rew1estim1	t1_rew0estim0	t1_rew0estim1	t1_rew1estim0	t1_rew1estim1	z_rew0estim0	z_rew0estim1	z_rew1estim0	z_rew1estim1
CyRT180108	1.506783761	1.506783761	1.506783761	1.506783761	0.236042782	0.236042782	0.236042782	0.236042782	2.076662427	1.955244137	1.763268699	1.930274671	12.01153873	13.24692353	9.662499763	11.26387883	-0.034724863	-0.034771007	0.127358083	0.049989378	0.31622	0.369182716	0.307375733	0.324370044	0.285781662	0.280817284	0.269630006	0.30768297	0.580772698	0.424795052	0.282692245	0.301109863
CyRT180115	1.191201965	1.191201965	3.134554525	3.134554525	0.144885056	0.144885056	0.174000929	0.174000929	1.987586449	2.074255626	2.124085763	1.893187413	11.68189025	10.99061382	10.07093327	9.757397182	-0.039798133	-0.044539834	0.044606765	0.031246188	0.3033	0.348280021	0.22852	0.2665	0.310700043	0.304734021	0.324499616	0.3945	0.603961193	0.568311526	0.473625328	0.521064051
CyRT180117	1.946531053	1.416149499	2.336175035	2.119412703	0.240167872	0.092665381	0.24524395	0.333496389	2.210030043	2.259865604	1.79887523	1.857657942	10.1748874	10.1748874	11.75863832	11.75863832	-0.088168764	-0.006885572	0.081171821	0.049687881	0.264080002	0.320273288	0.270280001	0.27832	0.261920017	0.248891558	0.353720458	0.367687104	0.61719389	0.41696474	0.430558339	0.448625917
CyRT180118	2.299150087	2.299150087	1.613132793	1.613132793	0.33407607	0.33407607	0.156052449	0.156052449	2.386889539	2.296578749	2.00124764	2.072444781	11.37157796	11.52421927	10.42503367	13.27369136	-0.134718932	-0.126333006	0.129268599	0.078456	0.28425	0.282532717	0.30748	0.32548	0.312797966	0.358489543	0.301529576	0.379531659	0.697272429	0.739212467	0.300781228	0.40898629
CyRT180129	1.818745459	1.054215658	2.93799451	2.798151116	0.174999007	0.100914017	0.195804166	0.069243138	2.324535076	1.90612632	2.855448402	2.450716608	12.43017384	11.49326804	9.281122612	10.18749441	-0.059622458	-0.068431408	0.061256744	0.129813219	0.294259591	0.303220041	0.12645	0.289380016	0.278503265	0.284786996	0.229549214	0.237620515	0.613842014	0.584658072	0.456624875	0.246389333
CyRT180131	1.735048713	1.735048713	1.24037284	1.24037284	0.316475745	0.316475745	0.184249475	0.184249475	2.03351372	1.557027206	2.099779634	1.695318175	12.35392173	9.72488034	12.92180592	11.42823982	-0.039117929	-0.040011898	0.080203016	0.015979744	0.35718	0.308370805	0.280387109	0.27638	0.34383713	0.343629196	0.37065958	0.361625052	0.616591152	0.663545453	0.428611425	0.591769331
CyRT180201	1.851710289	2.228792922	2.063399107	1.382930356	0.258104625	0.19100253	0.26268232	0.069331523	2.26182896	1.478618452	1.904316941	1.872351222	11.53383853	13.30762751	12.03823403	11.54212001	-0.104030244	-0.009144544	0.093192103	0.111698274	0.29213029	0.40342	0.327418359	0.32722	0.333881716	0.388590985	0.346933107	0.411338673	0.663149198	0.481958408	0.332888714	0.307864807
CyRT180205	1.647670749	1.009356476	2.005054316	0.700149152	0.261106974	0.192008115	0.190459815	0.140097662	1.971683351	2.114945589	2.479811757	1.616916606	13.59935358	11.20394867	10.79860129	11.02424617	-0.069823462	-0.069823462	0.09027969	0.09027969	0.344300007	0.296300705	0.189499878	0.320480612	0.385699993	0.296699395	0.32650011	0.383526166	0.69263051	0.587523443	0.512214236	0.408620416
CyRT180207	2.038124077	1.864449802	1.566646853	2.048428042	0.158362529	0.136235338	0.144457428	0.218914404	2.241019956	1.839623293	2.475517991	2.107077428	10.68956545	8.628200351	10.8897809	5.784171688	-0.049165371	-0.013117526	0.101474106	0.125122867	0.310182469	0.282180008	0.286398896	0.08138	0.275817531	0.236814699	0.290601104	0.267625955	0.577957419	0.43824693	0.3550497	0.597892441
CyRT180208	1.916247903	1.916247903	1.994635478	1.994635478	0.214355483	0.214355483	0.090741692	0.090741692	2.08617278	1.582716501	2.796194662	1.845155646	10.11331139	10.0186675	10.28399329	9.290587627	-0.052268537	-0.053711763	0.130970367	0.029049595	0.31117	0.340180014	0.316430001	0.2784	0.303839964	0.320819986	0.193552979	0.303618871	0.588986103	0.578009088	0.219955758	0.526821186
CyRT180214	1.417584396	1.417584396	1.417584396	1.417584396	0.320003069	0.320003069	0.320003069	0.320003069	1.994738635	1.795195058	1.727623727	1.532148816	11.05115136	10.68522048	11.76394768	6.426944328	-0.084148582	-0.067313125	0.087646066	0.159034253	0.30918	0.30438	0.335380025	0.291380003	0.337853819	0.300627417	0.334654833	0.259639052	0.631645214	0.593337159	0.369376588	0.422361527
CyRT180215	1.148753756	1.273841841	1.194989843	1.809423282	0.280599126	0.268067406	0.281929312	0.199050621	2.078674326	1.90263403	1.714085494	1.547272666	10.85608448	11.07871369	11.7239161	10.32303432	-0.060796008	-0.042286526	0.068353063	0.1062502	0.294252065	0.294252065	0.280501993	0.280501993	0.260747952	0.260747952	0.33650164	0.33650164	0.540351	0.502880355	0.419795609	0.454811205
CyRT180219	1.27276061	1.27276061	1.964191327	1.964191327	0.231013014	0.231013014	0.175412264	0.175412264	1.91531897	1.834427249	2.490411987	2.341259067	11.14013958	13.0492362	11.02923771	8.063444862	-0.078870202	-0.000761172	0.057101495	0.052622244	0.301180071	0.357439521	0.200405152	0.138416693	0.284820005	0.248560479	0.297576241	0.271624371	0.634429435	0.388501881	0.51012699	0.548639223
CyRT180222	2.288569881	1.478000216	1.931013747	1.924857959	0.361051103	0.247965088	0.25200005	0.233989094	2.261121424	2.245649879	3.247112975	2.97635317	11.97953145	11.55629486	12.84671241	10.09603198	-0.097198226	-0.056277918	0.024678416	0.077620188	0.34414336	0.34414336	0.168419782	0.168419782	0.327856799	0.327856799	0.344580219	0.344580219	0.655833869	0.552109401	0.579038421	0.527222924
CyRT180305	1.791041721	1.204429194	2.136094438	2.061898119	0.283307536	0.173010057	0.392292539	0.19603263	1.905419879	1.952235978	2.059077009	2.255645218	11.03587162	11.91490509	10.46316257	4.622049717	-0.097282183	0.027176232	0.040794836	0.074790599	0.308170062	0.320380331	0.260419933	0.0184	0.336903143	0.32907812	0.315620477	0.248595932	0.641693045	0.534337562	0.420346503	0.719578739
CyRT180322	1.105551829	1.105551829	1.105551829	1.105551829	0.113999781	0.113999781	0.113999781	0.113999781	1.609319368	1.699866237	1.711069829	1.834854787	7.728357549	7.733892022	10.92893681	4.98648494	-0.040146766	0.077039914	0.043336629	0.226118138	0.28518	0.260356917	0.338200218	0.240399993	0.287839116	0.289643084	0.333802039	0.243600011	0.480378305	0.71062582	0.338565562	0.545004256
CyRT180326	1.230527043	1.784443045	1.764382616	1.026548168	0.194422844	0.190800209	0.243300566	0.101027632	2.404924991	2.662699382	2.27531089	2.027292336	9.713226939	8.629370467	8.449428463	9.860595964	-0.089722017	-0.028136624	0.017271514	0.098940953	0.277297915	0.267280293	0.238529966	0.33953	0.31114969	0.193715845	0.34248244	0.371473894	0.650642441	0.407355855	0.512733447	0.31550696
CyRT180402	1.762314895	1.762314895	1.762314895	1.762314895	0.137985352	0.137985352	0.137985352	0.137985352	1.910327887	1.531194347	1.888518367	1.622105104	11.02515756	7.407995257	10.17817096	9.419451235	-0.070883169	-0.219853922	0.073604254	0.003266199	0.324179831	0.310201203	0.297400025	0.3034	0.315295433	0.294760776	0.341578828	0.333611708	0.647448993	0.479508895	0.420082806	0.428829469
FaRT161223	0.375711116	0.375711116	0.867557392	0.867557392	0.126001321	0.126001321	0.16	0.16	1.341114929	1.286797901	2.047938749	1.942364614	9.726034042	7.902654037	11.74418312	9.537464945	-0.153996004	-0.142735162	0.006834479	-0.053591314	0.258530759	0.377514528	0.282517699	0.263549551	0.396470117	0.339485472	0.289482301	0.343480036	0.624875575	0.490351408	0.336461185	0.553165733
FaRT170117	2.018455308	2.018455308	0.885502946	0.885502946	0.080269213	0.080269213	0.124002644	0.124002644	1.344712364	1.207042068	1.775972775	1.694971833	6.521887189	6.723868246	12.21010454	7.918259754	-0.203662507	0.072453156	-0.026831504	0.160827399	0.256642645	0.283621748	0.274830022	0.199819998	0.312357355	0.36338	0.34019397	0.322180001	0.518879887	0.616045505	0.495914229	0.571969582
FaRT170120	0.626728856	1.864024135	1.343657733	0.985360597	0.10352257	0.036997273	0.128213749	0.085911296	1.112887304	1.289399874	2.044454267	1.963785964	7.948789564	7.948789564	11.47827461	11.47827461	-0.136567215	-0.249148333	0.055675238	0.091038017	0.266796755	0.249999767	0.2686239	0.316818701	0.363203285	0.405200105	0.25638	0.259181299	0.535786523	0.660012359	0.358172888	0.276419108
FaRT170124	0.899832754	0.899832754	0.899832754	0.899832754	0.074198598	0.074198598	0.074198598	0.074198598	1.250866518	1.40013479	2.290529417	1.755001187	8.517485805	9.962238706	11.61961903	9.854701734	-0.193363486	-0.168627247	0.057566604	0.123494082	0.267513999	0.233532225	0.262538346	0.292730405	0.375450412	0.378468262	0.260470001	0.32028	0.535049468	0.702554325	0.341961418	0.366143415
FaRT170210	1.037121827	1.037121827	1.682776382	1.682776382	0.076000014	0.076000014	0.188536008	0.188536008	1.234399874	1.164693218	2.249818833	2.865657325	7.822741793	9.128088018	10.35897084	8.778563697	-0.075150718	-0.137450143	0.034249766	0.086170254	0.275827732	0.323538258	0.209819945	0.194869966	0.315172273	0.406409391	0.29018	0.260130033	0.457465812	0.626057047	0.459808945	0.458255164
FaRT170215	1.42605403	0.729493224	2.083518764	0.982328399	0.082002095	0.093988454	0.12355094	0.15282013	1.118734486	1.085735417	2.331124525	1.566947983	10.38791646	9.32853544	13.46652919	11.0146786	-0.153030532	-0.091935979	0.01999149	0.095022219	0.295604318	0.296665447	0.25864319	0.27781933	0.384395682	0.37838	0.257182051	0.3532	0.541287443	0.530963582	0.382873447	0.507170177
FaRT170217	1.37536631	1.37536631	1.37536631	1.37536631	0.049565393	0.049565393	0.049565393	0.049565393	1.32732131	1.552801831	2.329511981	2.449144815	8.1319712	8.430313641	10.36070792	11.19464015	-0.009993912	-0.213555937	0.060760519	0.10782819	0.319793857	0.271667017	0.2798361	0.307818619	0.302206179	0.37132999	0.29217043	0.298181893	0.387499559	0.543304516	0.404772347	0.304887202
FaRT170221	1.809895789	0.16370478	1.369017084	0.858630036	0.069998811	0.160999798	0.333158581	0.120091756	1.897311598	1.205915629	2.261555351	2.213898946	9.960851564	8.823717859	11.75162834	9.13140072	-0.076347435	-0.231047122	0.039006169	0.083756063	0.336232851	0.29952652	0.297724105	0.296615315	0.266480056	0.45747348	0.31728	0.315419961	0.256658868	0.629163664	0.421908059	0.351109093
FaRT170223	1.06314798	1.06314798	1.06314798	1.06314798	0.076990365	0.076990365	0.076990365	0.076990365	1.523233182	1.23802928	2.657160994	2.200350926	8.379584767	7.402935795	12.61391542	8.048813892	-0.294181759	-0.12624503	0.055607969	0.125067684	0.240519837	0.332670068	0.291512557	0.371734462	0.41548	0.308330008	0.240499965	0.23826556	0.727002157	0.449811117	0.349863312	0.312328911
FaRT170227	1.742079762	1.742079762	1.070886958	1.070886958	0.092045105	0.092045105	0.152817166	0.152817166	1.675931256	1.221336755	2.008493821	1.951500068	8.435017201	9.790212121	11.5316681	12.17528086	-0.160649534	-0.248196734	0.045372265	0.031658182	0.219529872	0.295703845	0.287526108	0.292689609	0.342470008	0.417300154	0.30548034	0.335310392	0.631039055	0.676480136	0.379787101	0.37318543
FaRT170315	1.256988492	1.256988492	1.256988492	1.256988492	0.080000028	0.080000028	0.080000028	0.080000028	1.085558132	1.342981479	2.245899184	1.658614977	11.15870494	8.472436827	9.992187847	9.963807573	-0.09902533	-0.126604591	0.082266529	0.07372465	0.331774714	0.283920319	0.257700615	0.320954191	0.382225288	0.373281584	0.249299813	0.33805	0.490175967	0.496926684	0.35795207	0.393059806
FaRT170320	3.65544909	0.343107316	1.168638453	0.612483967	0.080663044	0.22899992	0.481943595	0.222000023	2.356491544	1.039877705	1.535520058	1.378770462	7.976242242	8.134944714	12.57585957	11.00185662	0.042797669	-0.095313847	0.002225597	0.074998715	0.251720211	0.3117	0.29091075	0.329883658	0.18828	0.3703	0.3351	0.373116342	0.241314672	0.481439283	0.486801353	0.469350082
FaRT170331	1.106808754	1.106808754	1.106808754	1.106808754	0.134930479	0.134930479	0.134930479	0.134930479	1.213333519	1.286592984	1.901295246	1.470835437	7.632238731	9.561284161	11.63425475	10.694583	-0.208400672	-0.110166755	0.049781065	0.057898039	0.295556815	0.330619978	0.310754243	0.313720002	0.38345	0.343380024	0.326280209	0.35928	0.570261395	0.508469582	0.39569651	0.533411254
FaRT170403	1.541715323	1.882068677	0.929248236	1.166604859	0.080999962	0.109975534	0.280867094	0.210192476	1.355258426	1.355258426	2.032050995	2.032050995	8.463212366	7.697804941	12.40858812	10.92687465	-0.227559286	-0.129895394	0.055580949	0.121187649	0.258599996	0.300630105	0.310632932	0.308820022	0.401400006	0.27337	0.295397658	0.30018	0.676467401	0.467250468	0.354563761	0.332457884
FaRT170405	1.120624453	1.120624453	1.120624453	1.120624453	0.093986091	0.093986091	0.093986091	0.093986091	1.308289569	1.164427528	2.43432713	1.730978532	9.332694619	9.11569655	12.35573872	12.25067557	-0.029823333	-0.199418025	0.03754502	0.060918052	0.316653284	0.303630378	0.23177016	0.332631736	0.340370168	0.381370025	0.2932	0.31138	0.390652949	0.600494734	0.470072239	0.35709639
FaRT170414	1.275122187	1.275122187	1.275122187	1.275122187	0.114999974	0.114999974	0.114999974	0.114999974	1.231532226	1.019991466	2.412328745	1.406832274	8.430991965	8.755297849	11.20208024	9.900763772	-0.191475201	-0.166898046	0.045667773	0.008119156	0.26164995	0.27565	0.226825824	0.301820079	0.395350051	0.35735	0.265170384	0.32118	0.657968297	0.589912902	0.384298565	0.452659279
FaRT170421	1.896227315	0.889857947	0.40745279	1.341076126	0.073000507	0.089999566	0.163175893	0.363452796	1.212502402	1.212502402	1.821421464	1.821421464	9.059161904	7.818874934	9.951341339	7.744109451	-0.0433191	-0.152297482	0.05546456	0.117456639	0.345520711	0.349538378	0.258520026	0.341725391	0.383480005	0.414470002	0.32148	0.36127461	0.432945262	0.433718453	0.47041547	0.352017147
FaRT170517	2.070519844	0.64166666	0.828495916	1.152870602	0.092591851	0.074995464	0.287994204	0.263192192	1.435509392	1.004997529	1.868143474	1.703670896	8.118027475	7.903508737	13.06896939	7.489554241	-0.184380791	-0.068337843	-0.004441961	0.085417304	0.269650401	0.322819987	0.287575389	0.247814519	0.320350332	0.412180013	0.345430038	0.336180001	0.519335514	0.519335514	0.50806402	0.50806402
FaRT170522	1.113657206	1.113657206	1.113657206	1.113657206	0.081388849	0.081388849	0.081388849	0.081388849	1.323193974	1.1732308	2.321867124	1.937969014	8.81675998	9.770165219	11.34178522	11.4390702	-0.135240732	-0.10547342	0.023691102	0.088192412	0.282620001	0.285625701	0.234626569	0.293933653	0.370380001	0.42237448	0.296371125	0.312079021	0.565238935	0.638188597	0.447418963	0.321978574
FaRT170531	2.760398319	0.749180757	0.525480129	1.076112394	0.120824824	0.102995651	0.116273995	0.262768153	1.725556085	1.172235191	1.762689111	1.614453971	7.993610593	7.492093407	11.75184411	9.62262251	-0.18803791	-0.095983479	0.042426701	0.065771674	0.254720061	0.274313219	0.292740177	0.30470005	0.31228	0.409470009	0.324259823	0.3143	0.579739669	0.579739669	0.424658042	0.424658042
FaRT170605	0.863992097	0.863992097	0.863992097	0.863992097	0.086014829	0.086014829	0.086014829	0.086014829	1.369188922	1.172997429	2.241648537	2.32133593	9.49728696	8.490888816	12.06194101	11.9088245	-0.099454297	-0.19783523	0.028413284	0.078798607	0.355602125	0.276498162	0.267726652	0.280730124	0.331401303	0.429480095	0.326295017	0.30327	0.392674616	0.704298513	0.444394182	0.353862306
